# Supplementary material for: Translation and transcultural validation of the Dutch Hospital for Special Surgery Paediatric Activity Brief Scale (HSS Pedi-FABS)
Source: Research Square preprint supplement (doi:10.21203/rs.3.rs-361480/v1), 2021-03-26
Supplement: Supplementary file 1 [file 535c9b705bbccd109b50269c.docx]

**Additional file 1 – Dutch HSS Pedi-FABS questionnaire**

**Hospital for Special Surgery Pediatric Functional Activity Brief Scale (HSS Pedi-FABS)**

*De HSS Pedi-FABS is een korte, Amerikaanse vragenlijst over lichamelijke activiteit bij kinderen. De scores van de antwoorden worden bij elkaar opgeteld en de totale score geeft een weergave van de lichamelijke activiteit bij kinderen.*

**Hoe werkt het?** Kies 1 antwoord voor elke activiteit of vraag.

Geef in de tabel aan hoe vaak je elke activiteit hebt uitgeoefend in de AFGELOPEN MAAND terwijl je fit was en geen blessure had.

| **Activiteit** | **Minder dan één keer per maand** | **Eén keer per maand** | **Eén keer per week** | **2-3 keer per week** | **4 keer per week of vaker** |
| --- | --- | --- | --- | --- | --- |
| **Rennen** tijdens het beoefenen van een sport, gymmen of tijdens het hardlopen |  |  |  |  |  |
| **Snel wisselen van richting** tijdens het rennen (bijvoorbeeld bij voetbal, hockey, tikkertje, slalommen) |  |  |  |  |  |
| **Plotseling stoppen** tijdens het rennen |  |  |  |  |  |
| **Draaien** van je lichaam wanneer je voet vast staat op de grond (bijvoorbeeld bij voetbal, hockey, skiën) |  |  |  |  |  |
| **Uithoudingsvermogen:** sporten zo lang als je kunt zonder te stoppen |  |  |  |  |  |
| **Duursport:** een uur lang sporten zonder te stoppen |  |  |  |  |  |

**Competitie:** Neem je deel aan georganiseerde sporten of activiteiten in competitieverband?

- Nee (bijvoorbeeld alleen gymles op school)
- Ja, maar zonder een scheidsrechter of jury (bijvoorbeeld sporten op straat of bij een club)
- Ja, met scheidsrechter of jury
- Ja, op nationaal of professioneel niveau

**Begeleiding:** Neem je, naast gymles, deel aan sporten of activiteiten onder begeleiding van een coach, trainer of instructeur?

- Nee
- Ja, 1-2 keer per week
- Ja, 3-4 keer per week
- Ja, 5 keer per week of vaker
